# Supplementary material for: Thermochromic and solvatochromic Nafion films incorporating cationic metal–chelate complexes
Source: Royal Society of Chemistry journal article supplement (doi:10.1039/c3cc41399c), 2013-01-01
Supplement: c3cc41399c.pdf [file c3cc41399c.pdf]

## Electronic Supplementary Information

### Multi-Responsive Nafion Films Containing Cationic Metal-Chelate Complexes

Yusuke Funasako and Tomoyuki Mochida\*

*Department of Chemistry, Graduate School of Science, Kobe University, Rokkodai, Nada, Hyogo 657-8501, Japan*

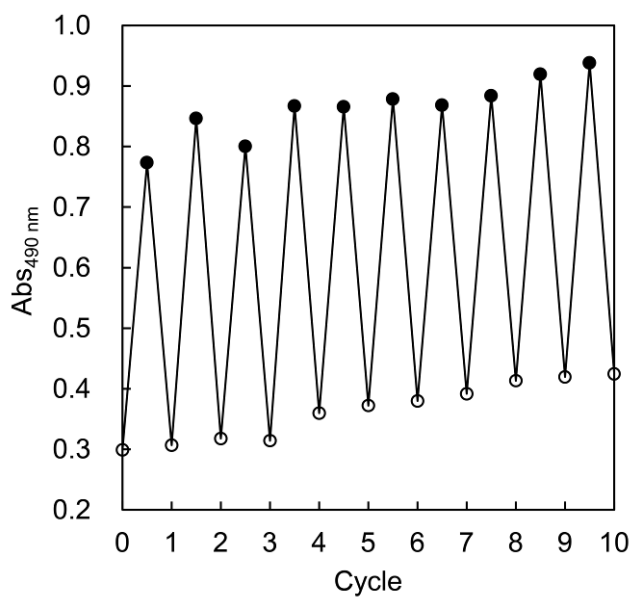

**Fig. S1.** Absorbance changes of [1·3MeOH]-Nafion monitored at 490 nm for repeated temperature changes between -40 °C (open circles) and 70 °C (filled circles).

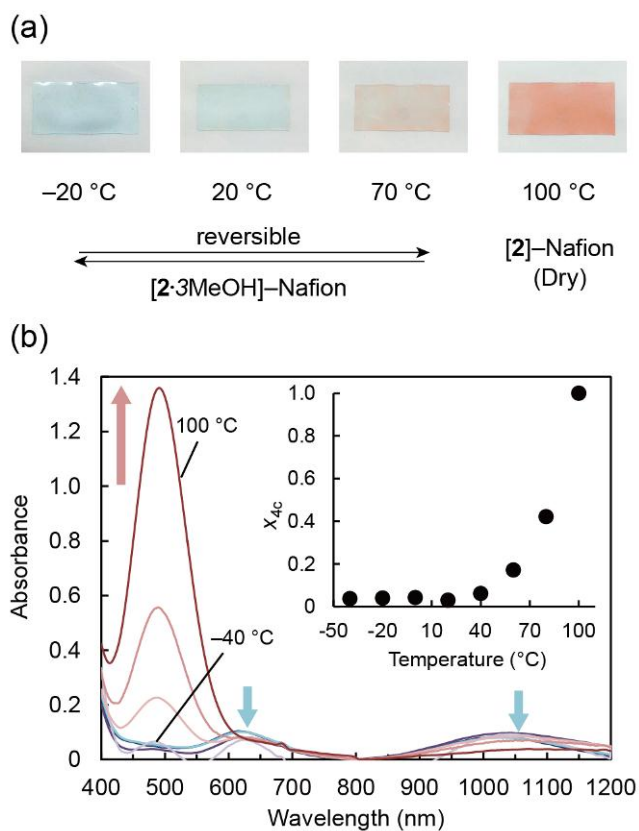

**Fig. S2.** (a) [2·3MeOH]-Nafion at various temperatures. (b) UV-vis absorption spectra of [2·3MeOH]-Nafion recorded between -40 °C and 100 °C at 20 K intervals. The change is irreversible above 80 °C because of the desorption of MeOH. The insert shows the temperature dependence of the molar ratio ( $x_{4c}$ ) of four-coordinated species in the film.

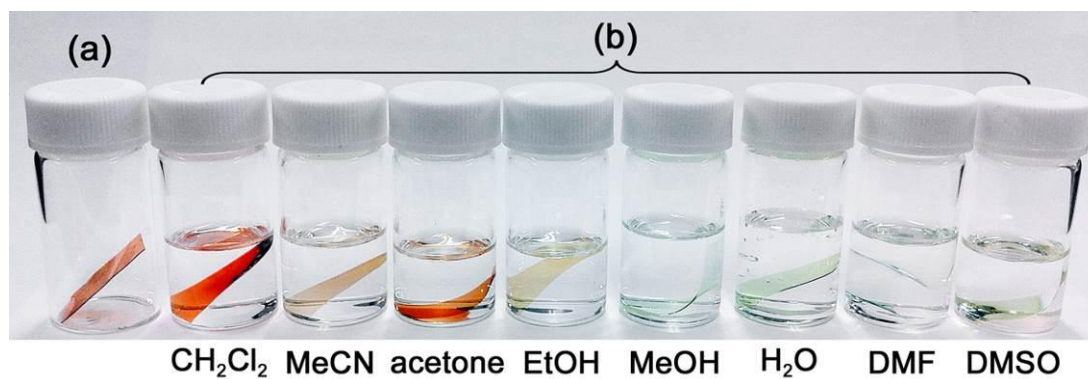

**Fig. S3.** [1]-Nafion (a) before and (b) after immersion in various solvents.
